# Supplementary material for: Isomadecassoside, a New Ursane-Type Triterpene Glycoside from Centella asiatica Leaves, Reduces Nitrite Levels in LPS-Stimulated Macrophages
Source: PubMed Central journal article supplement (PMC8064468; doi:10.3390/biom11040494), 2021-03-25

*Supplementary Materials*

***Isomadecassoside, a New Ursane-Type Triterpene Glycoside from Centella asiatica Leaves, Reduces Nitrite Levels in LPS-Stimulated Macrophages***

Giuseppina Chianese<sup>1</sup>, Francesca Masi<sup>1</sup>, Donatella Cicia<sup>1</sup>, Daniele Ciceri<sup>2</sup>, Sabrina Arpini<sup>2</sup>, Mario Falzoni<sup>2</sup>, Ester Pagano<sup>1,3</sup>, Orazio Taglialatela-Scafati<sup>1,\*</sup>

| <b>Supporting data</b>                                     | <b>Page</b> |
|------------------------------------------------------------|-------------|
| <b>S1:</b> <sup>1</sup> H NMR spectrum of isomadecassoside | 2           |
| <b>S2:</b> 2D NMR HSQC spectrum of isomadecassoside        | 2           |
| <b>S3:</b> 2D NMR HMBC spectrum of isomadecassoside        | 3           |
| <b>S4:</b> 2D NMR COSY spectrum of isomadecassoside        | 3           |
| <b>S5:</b> 2D NMR NOESY spectrum of isomadecassoside       | 4           |

**Figure S1:**  $^1\text{H}$  NMR spectrum of isomadecassoside ( $\text{CD}_3\text{OD}$ , 700MHz)

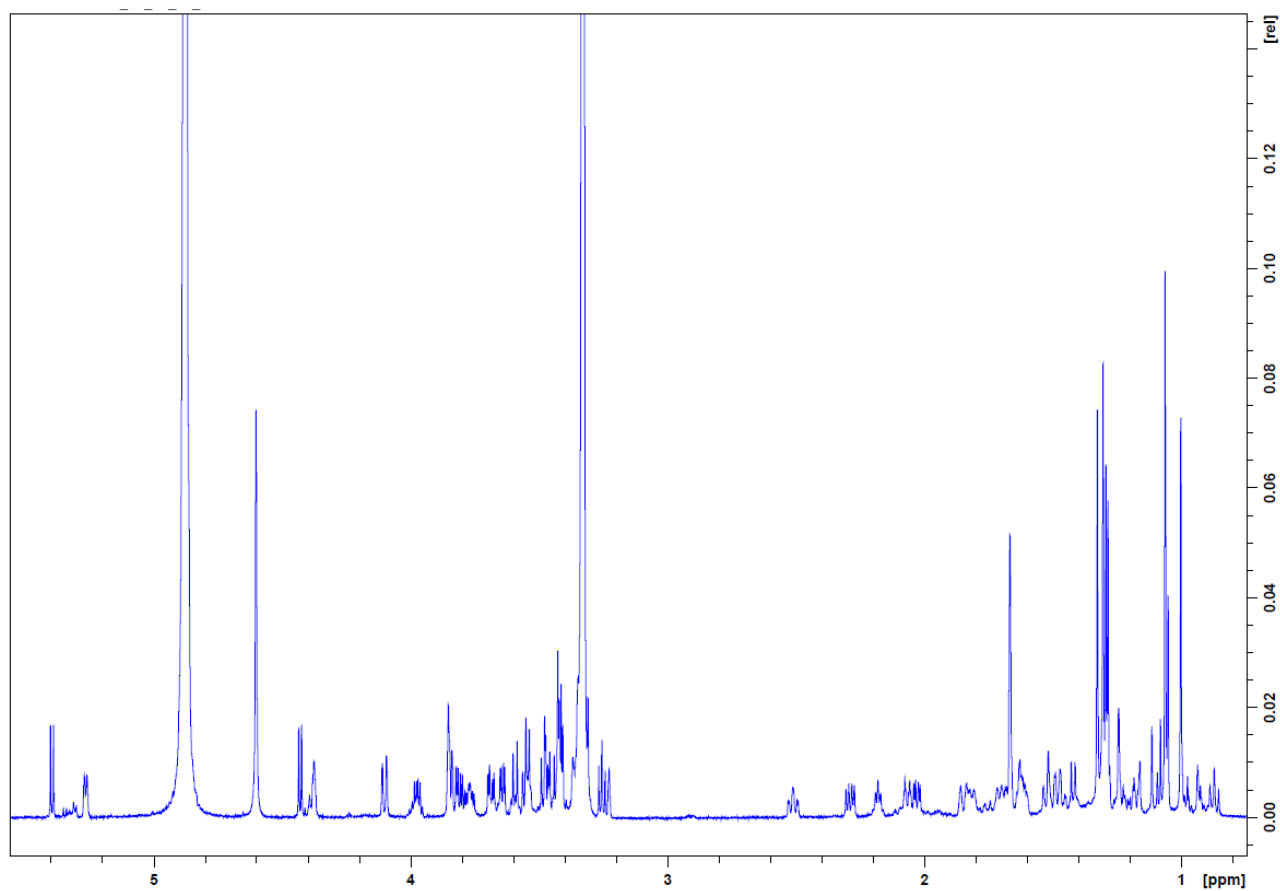

**Figure S2:** 2D NMR HSQC spectrum of isomadecassoside ( $\text{CD}_3\text{OD}$ )

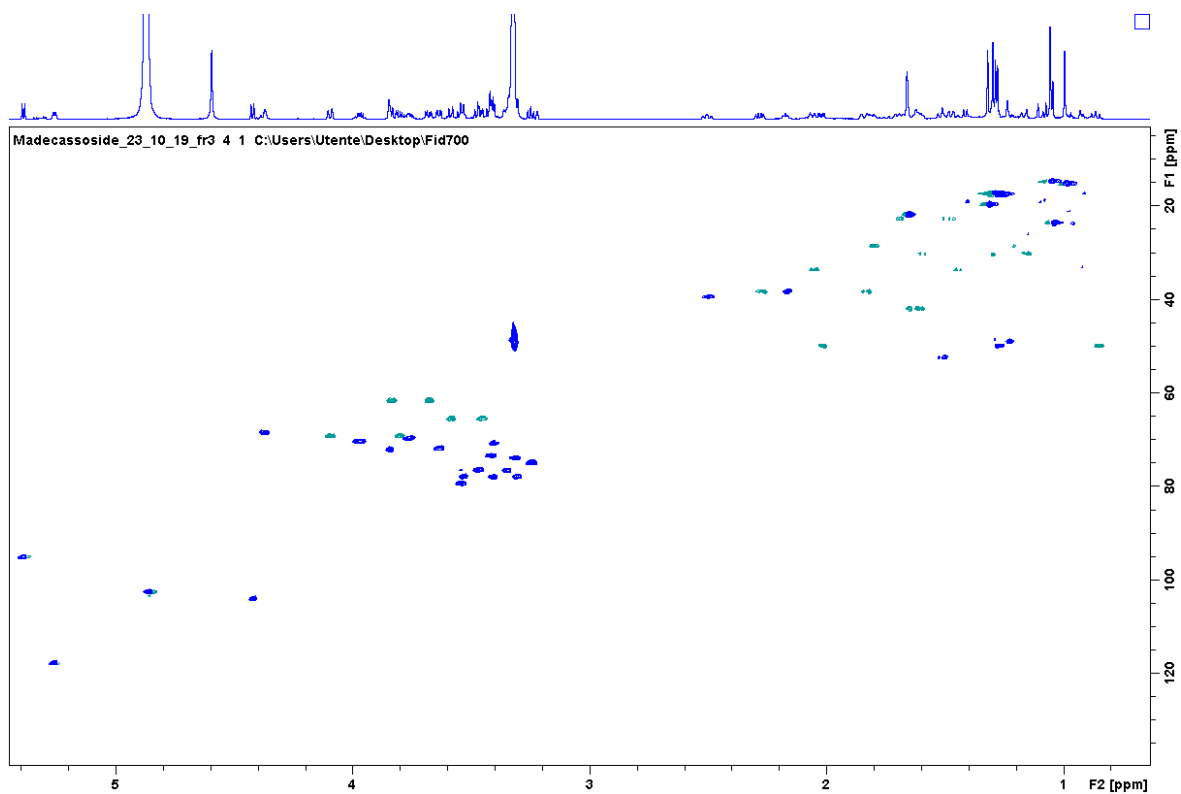

Figure S3: 2D NMR HMBC spectrum of isomadecassoside (CD<sub>3</sub>OD)

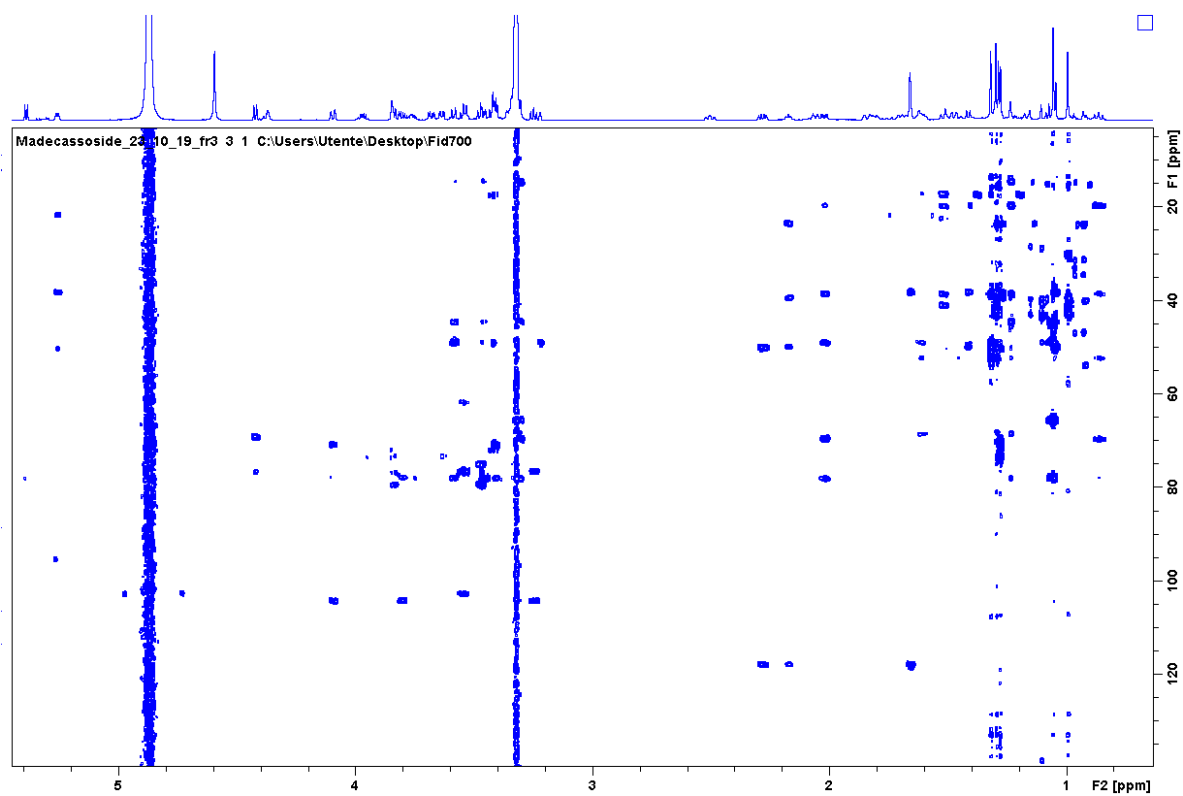

Figure S4: 2D NMR COSY spectrum of isomadecassoside (CD<sub>3</sub>OD)

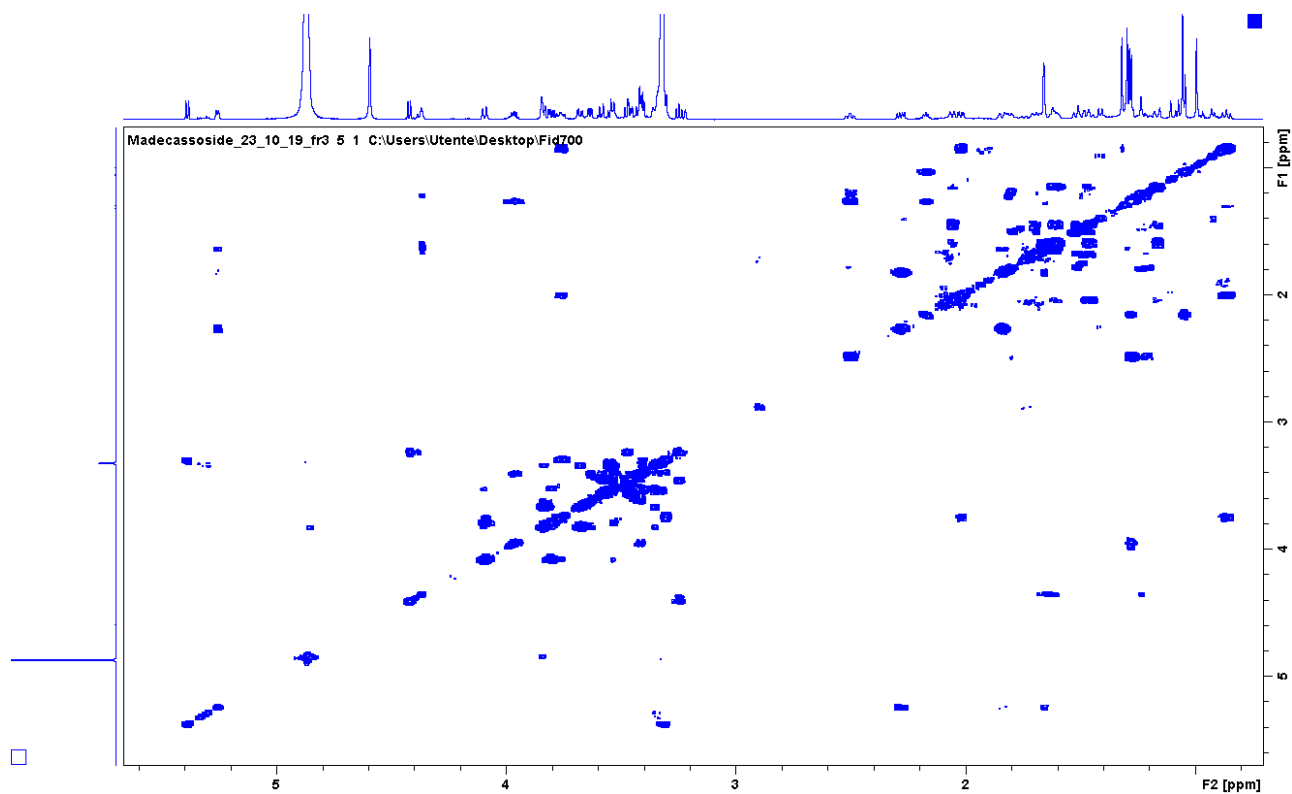

**Figure S5:** 2D NMR NOESY spectrum of isomadecassoside (CD<sub>3</sub>OD)

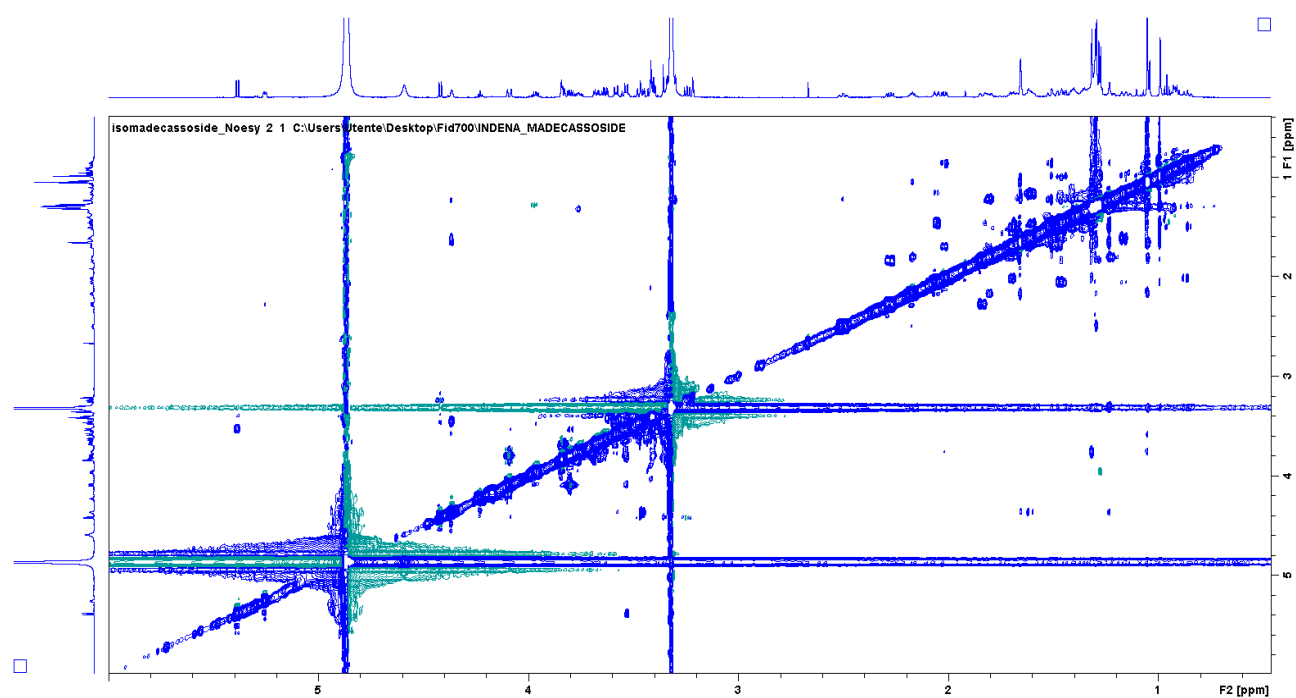

Supplement: biomolecules-11-00494-s001.pdf [file biomolecules-11-00494-s001.pdf]
